# Supplementary material
Source: PubMed Central journal article supplement (PMC3365278)
Supplement: supp_ASN.2010111127_Supplemental_Information_File.pdf [file supp_ASN.2010111127_Supplemental_Information_File.pdf]

## Supplemental tables

**Table S1: Biological parameters of animals used for histological analysis of GFAP and myelin loss.**

| Groups (n)                                                 | NormoNa | HypoNa  | Hypertonic NaCl |         |         |         |         |         |
|------------------------------------------------------------|---------|---------|-----------------|---------|---------|---------|---------|---------|
|                                                            | 1 (n=6) | 2 (n=6) | 3 (n=6)         | 4 (n=6) | 5 (n=6) | 6 (n=6) | 7 (n=6) | 8 (n=6) |
| Time of SNa analysis                                       |         |         | 6hrs            | 12 hrs  | 24 hrs  | 24 hrs  | 24 hrs  | 24 hrs  |
| Time of histological analysis (after correction of HypoNa) | NA      | 0hrs    | 6hrs            | 12 hrs  | 24 hrs  | 2 days  | 3 days  | 6 days  |
| Na before correction (mEq/L)                               | 140 ± 2 | 102 ± 1 | 104 ± 3         | 106±4   | 106±2   | 103±3   | 105 ± 2 | 100± 6  |
| Na after the correction*                                   | NA      | NA      | 133± 1          | 134±3   | 135±2   | 132 ± 2 | 130 ± 2 | 126± 2  |
| Delta SNa mEq/L                                            | NA      | NA      | 29 ± 4          | 28±3    | 30±1    | 29 ± 2  | 25± 3   | 26± 4   |

\*p <0.05 for Na after the correction vs Na before the correction in group 3 to 8.

**Table S2: Biological parameters of animals used for the quantification of gene expression by quantitative RTPCR**

|                       | Controls (n=5) | Hyponatremia (n=5) | NaCl 12hrs (n=5) | NaCl 24hrs (n=7) |
|-----------------------|----------------|--------------------|------------------|------------------|
| SNa before correction | 144±1          | 110±0.5            | 105 ± 1          | 113± 1           |
| SNa after correction  | NA             | NA                 | 134 ± 1          | 142 ± 1*         |
| ΔSNa                  | NA             | NA                 | 29 ± 1           | 29 ± 1           |

\*p <0.05 for SNa before the correction vs after the correction.

**Table S3: Biological parameters of the total of animals used in experiments involving S100B measurements.**

|                             | NaCl SNa < 23 (n= 11 ) | NaCl SNa > 23 (n= 31 ) |
|-----------------------------|------------------------|------------------------|
| Groups                      | 1                      | 2                      |
| SNa before correction       | 112±1                  | 107±1*                 |
| SNa 24 hrs after correction | 131±2                  | 137±1*                 |
| ΔSNa 24 hrs                 | 19±1                   | 30±1*                  |
| S100B before correction     | 2.61±0.39              | 2.32±0.24              |
| S100B after the correction  | 2.06±0.39°             | 3.78±0.36**°           |
| ΔS100B                      | -0.50±0.51             | 1.45, ±0.25**          |

For SNa before correction: \*p<0.05 for 1 vs 2 for SNa after the correction and p= 0.0001 in 1 vs 2 for ΔSNa. \*\* p=0.008 for S100B after correction in 1 vs 2 and for ΔS100B, p=0.0018 in 1 vs 2. ° S100b before and after the correction: p= NS in group1 and p<0.0001 in group 2.

**Table S5: Sequence of the primers used for RT-PCR**

| Gene accession number      | Sense                      | Antisense                |
|----------------------------|----------------------------|--------------------------|
| IL1 beta NM 031512.2       | AAGACAAGCCTGTGTTGCTGAAGG   | TCCCAGAAGAAAATGAGGTCGGTC |
| TNF alpha NM 012675.3      | AAATGGGCTCCCTCTCATCAGTTC   | TCTGCTTGGTGGTTTGCTACGAC  |
| IL10 NM 012854             | TAAGGGTTACTTGGGTTGCC       | TATCCAGAGGGTCTTCAGC      |
| MCP NM 031530.1            | TGTCTCAGCCAGATGCAGTTA      | TGCTGCTGGTGATTCTCTTGT    |
| Connexin 47 NM 001100784.1 | GCATCCAGAGGGAGGGCCTGAT     | CGGTTGGCCGCGACACGAA      |
| Connexin 43 NM 012567.2    | TTGAGCGCGGTCTACACCTGC      | CGTTTCTCCCTTCACGCGAT     |
| MBP AF439750.1             | CCGTTCTAATTCCGAGGAGAGTGTGG | ACTGCAGCTGCGTGTCTGG      |
| CNPase NM 18630.1          | AGACGGCGTGGCGACTAGACT      | AATGATCCTGGCCGGCTGTCT    |
| Aldh1L1 NM 001007557.1     | AGGTGCCAGGTGCCTGGACA       | TGGTGACCACGCCTGGACGA     |
| GFAP NM 017009.1           | TCCTGGAACAGCAAAACAAG       | CAGCCTCAGGTTGGTTTCAT     |
| Iba 1 NM 017196.3          | AGAGGTGTCCAGTGGCTCCGA      | GGTCCTCGGTCCCACCGTGT     |
| GADPH NM 017008            | AATGTATCCGTTGTGGATCT       | CAAGAAGGTGGTGAAGCAGG     |

GADPH: glyceraldehyde 3-phosphate dehydrogenase; CNPase: 2'-3' cyclic nucleotide phosphodiesterase. MCP-1: Macrophage chemotactic protein 1; MBP: myelin basic protein. GFAP: glial fibrillary acidic protein. IL: interleukin. GFAP glial fibrillary acidic protein. Aldh1L1: aldehyde dehydrogenase 1 family, member L1. Iba1: Ionized calcium binding adapter molecule 1. Primers were designed using primer blast ® software except for GFAP primer which was from ATRC reagent bank and was designed by Charles R. Vanderburg - Harvard Neurodiscovery Center - Boston, Massachusetts. All primers were synthesized by Eurogentec, Seraing, Belgium.

**Table S4: Antibodies used for immunohistochemistry and immunofluorescence.**

| Antibody                  | Target           | Concentration         | Supplier                           |
|---------------------------|------------------|-----------------------|------------------------------------|
| GFAP                      | Astrocytes       | IHC 1/2000; IF: 1/200 | Sigma-Aldrich . (Boonen , Belgium) |
| GFAP                      | Astrocytes       | IHC 1/1000; IF: 1/100 | Dako (Heverlee, Belgium)           |
| AQP4                      | Astrocytes       | IHC 1/1000            | Chemicon. (Brussels,Belgium)       |
| S100                      | Astrocytes       | IHC 1/1000; IF: 1/100 | Dako (Heverlee, Belgium)           |
| MBP                       | Myelin           | IHC 1/2000; IF: 1/100 | Abcam. (Cambridge,UK)              |
| CD68 (clone ED1)          | Microglia        | IHC1/300; IF: 1/100   | AbDSerotec (Dusseldorf, Germany)   |
| CD3                       | Lymphocytes      | IF 1/100              | BDPharmingen, (Brussels, Belgium)  |
| MPO                       | Neutrophils      | IF: 1/100             | Thermofischer (Duiven Belgium)     |
| APC (CC1)                 | Oligodendrocytes | IF: 1/100             | Calbiochem ( Merck Cambridge UK)   |
| MAP2                      | Neurons          | IHC 1/2000            | JP Brion.                          |
| Apoptag Kit               | Apoptotic cells  | As per manufacturer.  | Millipore (Brussels, Belgium)      |
| Anti mouse IgG Alexa 594  | Mouse IgG        | IF 1/100              | Invitrogen (Brussels, Belgium)     |
| Anti Rabbit IgG Alexa 594 | Rabbit IgG       | IF 1/100              | Invitrogen (Brussels, Belgium)     |
| Anti mouse IgG FITC       | Mouse IgG        | IF 1/100              | Invitrogen (Brussels, Belgium)     |

Abbreviations: GFAP: glial fibrillary acidic protein, AQP4: aquaporin 4, MBP: Myelin basic protein, MPO: myeloperoxidase, APC: adenomatous polyposis cancer, MAP2: microtubule associated protein 2, IHC: Immunohistochemistry, IF: Immunofluorescence

## Supplemental figures

**Figure S1.** Immunoreactivity for the astrocyte-specific markers S100B and aquaporin 4 (AQP4) is lost after rapid correction of chronic hyponatremia.

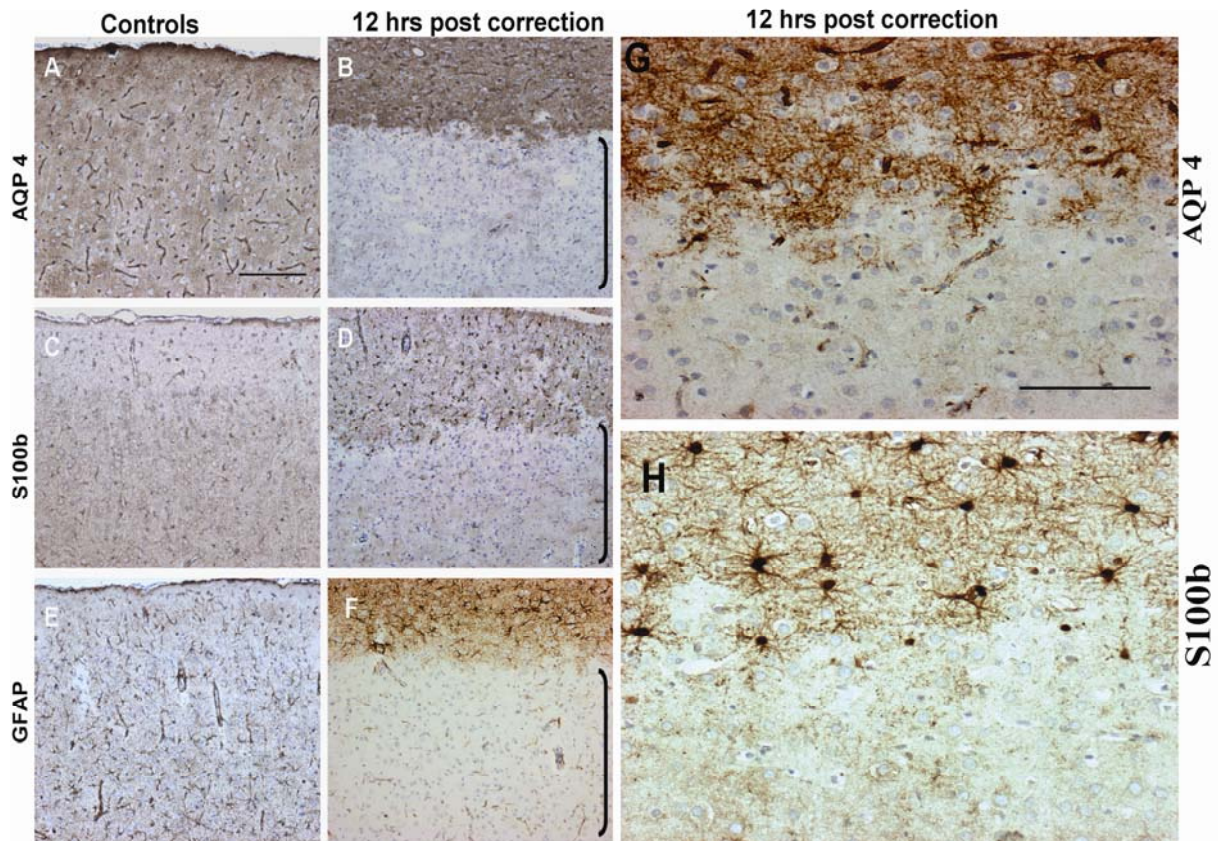

Reactivity for AQP4 reactivity is homogenous and preserved in uncorrected control (A) as opposed to rats 12 hrs post correction (B). The disappearance of S100B reactivity follow the same pattern 12 hrs postcorrection (C) compared to uncorrected controls (D). Those changes are identical to those observed for GFAP (E and F). A higher magnification of the regions of AQP4 and S100B loss is provided in (G) and (H) respectively. The scale bar is 200  $\mu$ m.

**Figure S2.** Astrogliosis is seen after the induction of ODS.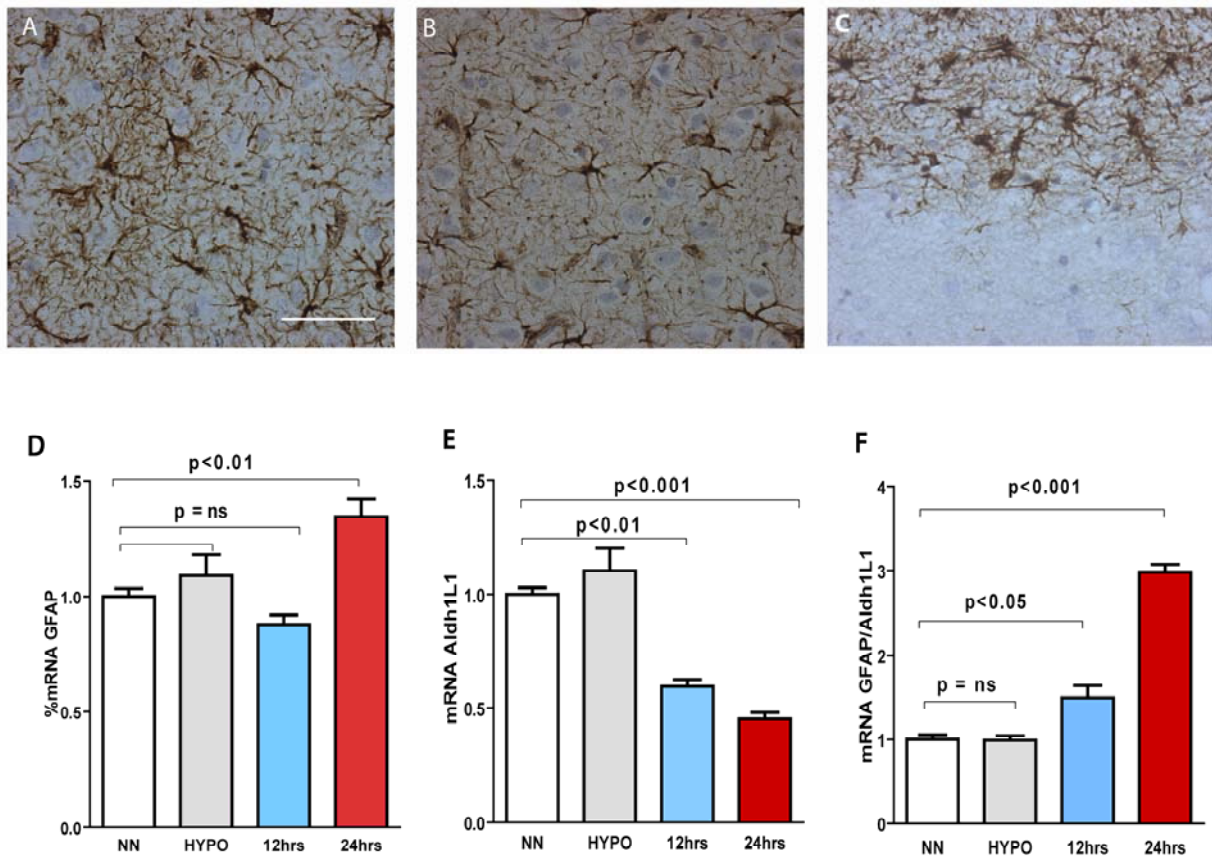

The panels (A) and (B) show the pattern of GFAP staining in normonatremic and hyponatremic rats and (C) shows the GFAP staining pattern 24 h after the correction of hyponatremia. Astrocytes in unaffected areas appear larger and have broader ramifications. In graph (D), quantification of GFAP mRNA expression in normonatremic rats (NN), hyponatremic controls (HYPO) and 12 and 24 h after hyponatremia correction shows increased GFAP transcript levels at 24 h postcorrection, which contrasts with the significant astrocyte death found at that time and suggests an increased production of GFAP in the remaining astrocytes. In graph (E) the expression of astrocyte-specific marker Aldh1L1 mRNA confirmed the significant depletion of astrocytes at 12 and 24 h postcorrection of hyponatremia ( $p < 0.01$  and  $p < 0.001$ , respectively, ANOVA,  $n=5-7$ ) and in (F) reactive gliosis was assessed by analyzing the ratio of GFAP to Aldh1L1 expression. No changes were detected in chronic hyponatremia, but GFAP:Aldh1L1 ratio significantly increased 12 and 24 h postcorrection ( $p < 0.05$  and  $p < 0.001$ , respectively, ANOVA,  $n=5-7$ )

**Figure S3. S100B is produced by reactive astrocytes in ODS.**

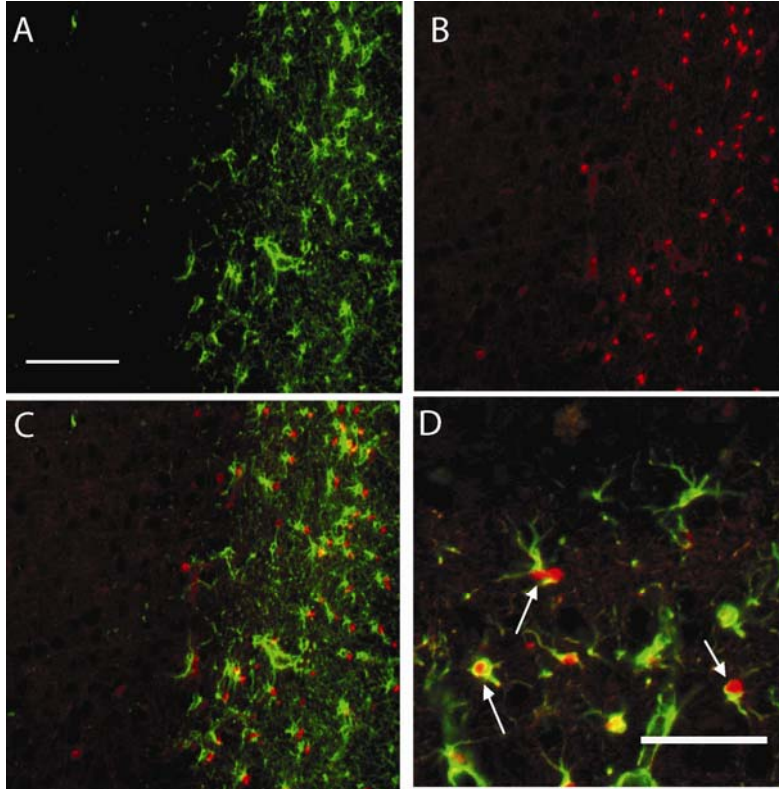

In panel (A-C) Colocalization of GFAP (green) and S100B (red) in astrocytes is seen 24 h after the correction of hyponatremia. Higher magnification in (D) with arrows pointing to double-positive cells.

**Figure S4. Early astrocyte loss in ODS does not result in neuronal damage.**

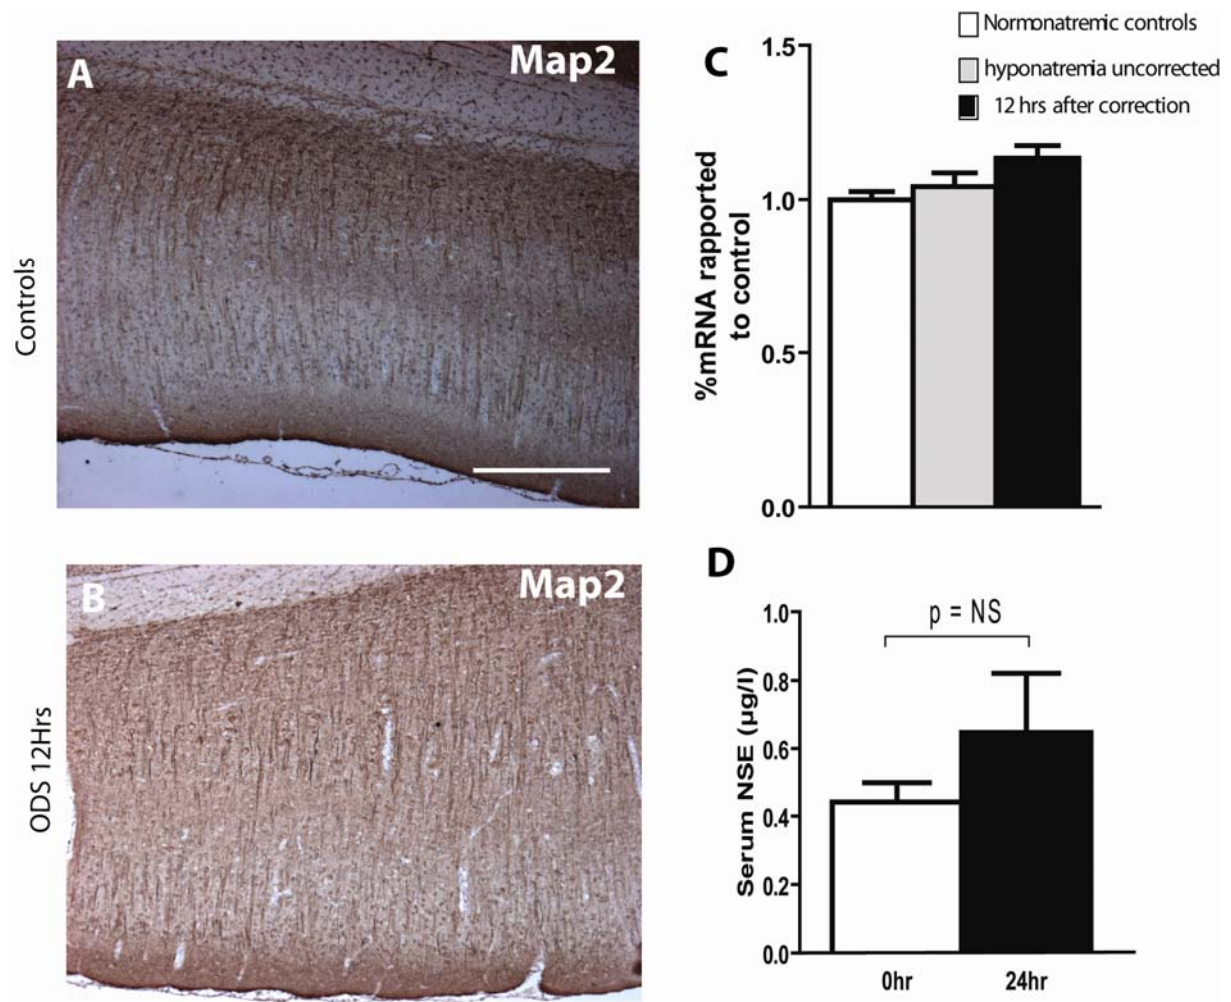

Panel A shows neuron (anti-Map-2) staining in the cortex of uncorrected hyponatremic rats and 12 h postcorrection (B) did not show any apparent neuronal loss. Also, in (C), using RTPCR, no changes in the transcription of NSE were found 12 h postcorrection, and (D) no changes in the serum levels of NSE were detected 24 h postcorrection. The scale bar is 200 µm.
